# Supplementary material for: Dicarboxylate-bridged (Mo2)n (n = 2, 3, 4) paddle-wheel complexes: potential intermediate building blocks for metal–organic frameworks
Source: Royal Society of Chemistry journal article supplement (doi:10.1039/c1dt11249j), 2011-01-01
Supplement: c1dt11249j.pdf [file c1dt11249j.pdf]

## Supporting Information

### Dicarboxylate-bridged $(\text{Mo}_2)_n$ ( $n = 2, 3, 4$ ) paddle-wheel complexes: potential intermediate building blocks for metal-organic frameworks

Mathias Köberl,<sup>a</sup> Mirza Cokoja,<sup>b</sup> Bettina Bechlars,<sup>b</sup> Eberhardt Herdtweck<sup>b</sup> and Fritz E. Kühn<sup>\*,a,b</sup>

<sup>a</sup> Molecular Catalysis, Catalysis Research Center, Technische Universität München, Ernst-Otto-Fischer-Strasse 1, D-85747 Garching, Germany. Tel: +49 89 289 13081; E-Mail: fritz.kuehn@ch.tum.de

<sup>b</sup> Chair of Inorganic Chemistry, Catalysis Research Center, Technische Universität München, Ernst-Otto Fischer-Strasse 1, D-85747 Garching, Germany.

#### Single Crystal X-Ray Structure Determination of Compound 2

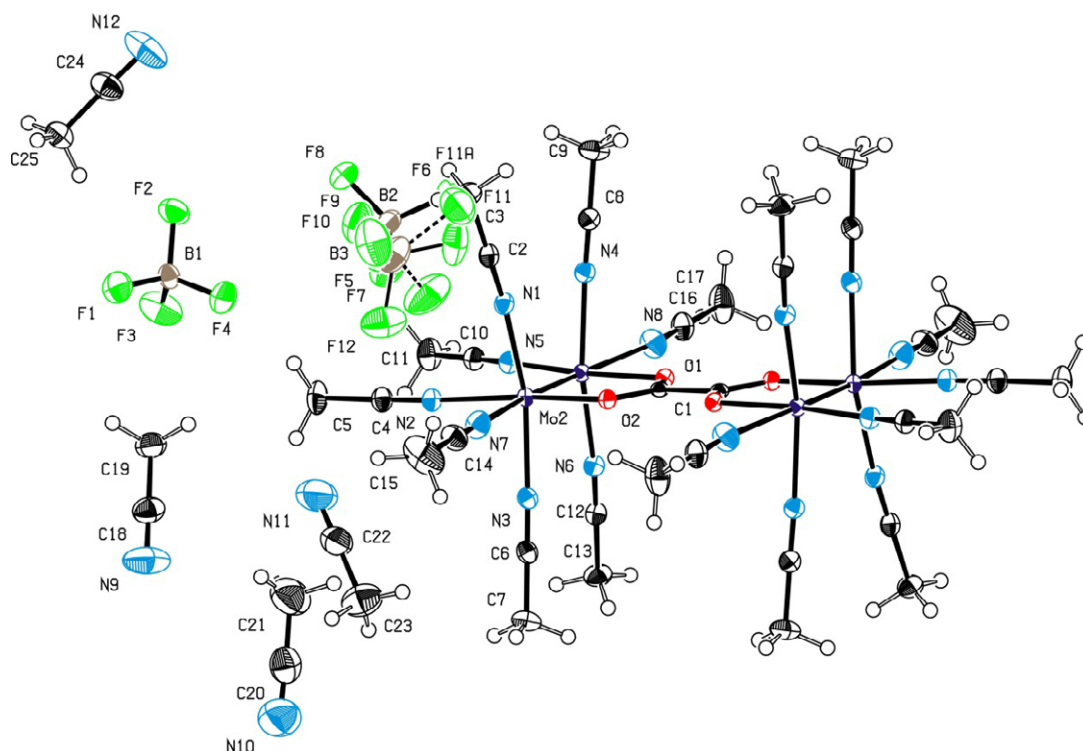

**Figure F1** – Ortep drawing with 50% ellipsoids. [6]

|                       |                                                                                                                                                                                                                                           |
|-----------------------|-------------------------------------------------------------------------------------------------------------------------------------------------------------------------------------------------------------------------------------------|
| Operator:             | *** Herdtweck ***                                                                                                                                                                                                                         |
| Molecular Formula:    | $\text{C}_{50} \text{H}_{72} \text{B}_6 \text{F}_{24} \text{Mo}_4 \text{N}_{24} \text{O}_4$<br>$[(\text{C}_{34} \text{H}_{48} \text{Mo}_4 \text{N}_{16} \text{O}_4)^{6+}], 6[(\text{B} \text{F}_4)^-], 8(\text{C}_2 \text{H}_3 \text{N})$ |
| Crystal Color / Shape | Red prism                                                                                                                                                                                                                                 |
| Crystal Size          | Approximate size of crystal fragment used for data collection:<br>$0.30 \times 0.41 \times 0.56$ mm                                                                                                                                       |

|                                                        |                                                                                                                                                                                                                                                                                                                                                                                                                                                                                      |                                                                                  |
|--------------------------------------------------------|--------------------------------------------------------------------------------------------------------------------------------------------------------------------------------------------------------------------------------------------------------------------------------------------------------------------------------------------------------------------------------------------------------------------------------------------------------------------------------------|----------------------------------------------------------------------------------|
| Molecular Weight:                                      | 1977.94 a.m.u.                                                                                                                                                                                                                                                                                                                                                                                                                                                                       |                                                                                  |
| F <sub>000</sub> :                                     | 1972                                                                                                                                                                                                                                                                                                                                                                                                                                                                                 |                                                                                  |
| Systematic Absences:                                   | h0l: h+l≠2n; 0k0: k≠2n                                                                                                                                                                                                                                                                                                                                                                                                                                                               |                                                                                  |
| Space Group:                                           | Monoclinic                                                                                                                                                                                                                                                                                                                                                                                                                                                                           | <i>P</i> 2 <sub>1</sub> / <i>n</i> (I.T.-No.: 14)                                |
| Cell Constants:                                        | Least-squares refinement of 9252 reflections with the programs "APEX suite" and "SAINT"                                                                                                                                                                                                                                                                                                                                                                                              |                                                                                  |
|                                                        | [1,2]; theta range 1.72° < θ < 25.46°; Mo(Kᾱ); λ = 71.073 pm                                                                                                                                                                                                                                                                                                                                                                                                                        |                                                                                  |
|                                                        | <i>a</i> =                                                                                                                                                                                                                                                                                                                                                                                                                                                                           | 1498.96(4) pm                                                                    |
|                                                        | <i>b</i> =                                                                                                                                                                                                                                                                                                                                                                                                                                                                           | 1836.86(5) pm β = 92.7229(14)°                                                   |
|                                                        | <i>c</i> =                                                                                                                                                                                                                                                                                                                                                                                                                                                                           | 1550.71(4) pm                                                                    |
|                                                        | <i>V</i> = 4264.9(2) · 10 <sup>6</sup> pm <sup>3</sup> ; <i>Z</i> = 2; <i>D</i> <sub>calc</sub> = 1.540 g cm <sup>-3</sup> ; Mos. = 0.68                                                                                                                                                                                                                                                                                                                                             |                                                                                  |
| Diffractometer:                                        | Kappa APEX II (Area Diffraction System; BRUKER AXS); rotating anode; graphite monochromator; 50 kV; 40 mA; λ = 71.073 pm; Mo(Kᾱ)                                                                                                                                                                                                                                                                                                                                                    |                                                                                  |
| Temperature:                                           | (-150±1) °C; (123±1) K                                                                                                                                                                                                                                                                                                                                                                                                                                                               |                                                                                  |
| Measurement Range:                                     | 1.72° < θ < 25.46°; h: -18/18, k: -22/22, l: -18/18                                                                                                                                                                                                                                                                                                                                                                                                                                  |                                                                                  |
| Measurement Time:                                      | 2 × 5 s per film                                                                                                                                                                                                                                                                                                                                                                                                                                                                     |                                                                                  |
| Measurement Mode:                                      | measured: 8 runs; 3202 films / scaled: 8 runs; 3202 films                                                                                                                                                                                                                                                                                                                                                                                                                            |                                                                                  |
|                                                        | φ- and ω-movement; Increment: Δφ/Δω = 0.50°; dx = 45.0 mm                                                                                                                                                                                                                                                                                                                                                                                                                            |                                                                                  |
| LP - Correction:                                       | Yes [2]                                                                                                                                                                                                                                                                                                                                                                                                                                                                              |                                                                                  |
| Intensity Correction                                   | No/Yes; during scaling [2]                                                                                                                                                                                                                                                                                                                                                                                                                                                           |                                                                                  |
| Absorption Correction:                                 | Multi-scan; during scaling; μ = 0.680 mm <sup>-1</sup> [2]                                                                                                                                                                                                                                                                                                                                                                                                                           |                                                                                  |
|                                                        | Correction Factors:                                                                                                                                                                                                                                                                                                                                                                                                                                                                  | T <sub>min</sub> = 0.6608 T <sub>max</sub> = 0.7452                              |
| Reflection Data:                                       | 84136                                                                                                                                                                                                                                                                                                                                                                                                                                                                                | reflections were integrated and scaled                                           |
|                                                        | 1464                                                                                                                                                                                                                                                                                                                                                                                                                                                                                 | reflections systematic absent and rejected                                       |
|                                                        | 82672                                                                                                                                                                                                                                                                                                                                                                                                                                                                                | reflections to be merged                                                         |
|                                                        | 7880                                                                                                                                                                                                                                                                                                                                                                                                                                                                                 | independent reflections                                                          |
|                                                        | 0.021                                                                                                                                                                                                                                                                                                                                                                                                                                                                                | R <sub>int</sub> : (basis <i>F</i> <sub>o</sub> <sup>2</sup> )                   |
|                                                        | 7880                                                                                                                                                                                                                                                                                                                                                                                                                                                                                 | independent reflections (all) were used in refinements                           |
|                                                        | 7572                                                                                                                                                                                                                                                                                                                                                                                                                                                                                 | independent reflections with <i>I</i> <sub>o</sub> > 2σ( <i>I</i> <sub>o</sub> ) |
|                                                        | 99.7 %                                                                                                                                                                                                                                                                                                                                                                                                                                                                               | completeness of the data set                                                     |
|                                                        | 536                                                                                                                                                                                                                                                                                                                                                                                                                                                                                  | parameter full-matrix refinement                                                 |
|                                                        | 14.7                                                                                                                                                                                                                                                                                                                                                                                                                                                                                 | reflections per parameter                                                        |
| Solution:                                              | Direct Methods [3]; Difference Fourier syntheses                                                                                                                                                                                                                                                                                                                                                                                                                                     |                                                                                  |
| Refinement Parameters:                                 | In the asymmetric unit:                                                                                                                                                                                                                                                                                                                                                                                                                                                              |                                                                                  |
|                                                        | 58                                                                                                                                                                                                                                                                                                                                                                                                                                                                                   | Non-hydrogen atoms with anisotropic displacement parameters                      |
| Hydrogen Atoms:                                        | In the difference map(s) calculated from the model containing all non-hydrogen atoms, not all of the hydrogen positions could be determined from the highest peaks. For this reason, the hydrogen atoms were placed in calculated positions (d <sub>C-H</sub> = 98 pm). Isotropic displacement parameters were calculated from the parent carbon atom (U <sub>H</sub> = 1.5 U <sub>C</sub> ). The hydrogen atoms were included in the structure factor calculations but not refined. |                                                                                  |
| Atomic Form Factors:                                   | For neutral atoms and anomalous dispersion [4]                                                                                                                                                                                                                                                                                                                                                                                                                                       |                                                                                  |
| Extinction Correction:                                 | no                                                                                                                                                                                                                                                                                                                                                                                                                                                                                   |                                                                                  |
| Weighting Scheme:                                      | <i>w</i> <sup>-1</sup> = σ <sup>2</sup> ( <i>F</i> <sub>o</sub> <sup>2</sup> ) + (a* <i>P</i> ) <sup>2</sup> + b* <i>P</i>                                                                                                                                                                                                                                                                                                                                                           |                                                                                  |
|                                                        | with a: 0.0175; b: 5.3086; <i>P</i> : [Maximum(0 or <i>F</i> <sub>o</sub> <sup>2</sup> ) + 2* <i>F</i> <sub>c</sub> <sup>2</sup> ]/3                                                                                                                                                                                                                                                                                                                                                 |                                                                                  |
| Shift/Err:                                             | Less than 0.001 in the last cycle of refinement:                                                                                                                                                                                                                                                                                                                                                                                                                                     |                                                                                  |
| Resid. Electron Density:                               | +0.76 e <sub>0</sub> <sup>-</sup> /Å <sup>3</sup> ; -0.56 e <sub>0</sub> <sup>-</sup> /Å <sup>3</sup>                                                                                                                                                                                                                                                                                                                                                                                |                                                                                  |
| R1:                                                    | Σ(  <i>F</i> <sub>o</sub>  -  <i>F</i> <sub>c</sub>  )/Σ  <i>F</i> <sub>o</sub>                                                                                                                                                                                                                                                                                                                                                                                                      |                                                                                  |
| [ <i>F</i> <sub>o</sub> > 4σ( <i>F</i> <sub>o</sub> ); | N=7572]:                                                                                                                                                                                                                                                                                                                                                                                                                                                                             | = 0.0220                                                                         |
| [all reflctns;                                         | N=7880]:                                                                                                                                                                                                                                                                                                                                                                                                                                                                             | = 0.0232                                                                         |
| wR2:                                                   | [Σ <i>w</i> ( <i>F</i> <sub>o</sub> <sup>2</sup> - <i>F</i> <sub>c</sub> <sup>2</sup> )/Σ <i>w</i> ( <i>F</i> <sub>o</sub> <sup>2</sup> ) <sup>2</sup> ] <sup>1/2</sup>                                                                                                                                                                                                                                                                                                              |                                                                                  |
| [ <i>F</i> <sub>o</sub> > 4σ( <i>F</i> <sub>o</sub> ); | N=7572]:                                                                                                                                                                                                                                                                                                                                                                                                                                                                             | = 0.0524                                                                         |
| [all reflctns;                                         | N=7880]:                                                                                                                                                                                                                                                                                                                                                                                                                                                                             | = 0.0537                                                                         |
| Goodness of fit:                                       | [Σ <i>w</i> ( <i>F</i> <sub>o</sub> <sup>2</sup> - <i>F</i> <sub>c</sub> <sup>2</sup> )/(NO-NV)] <sup>1/2</sup> = 1.079                                                                                                                                                                                                                                                                                                                                                              |                                                                                  |
| Remarks:                                               | Refinement expression Σ <i>w</i> ( <i>F</i> <sub>o</sub> <sup>2</sup> - <i>F</i> <sub>c</sub> <sup>2</sup> ) <sup>2</sup>                                                                                                                                                                                                                                                                                                                                                            |                                                                                  |

- [1] APEX suite of crystallographic software. APEX 2 Version 2008.4. Bruker AXS Inc., Madison, Wisconsin, USA (2008).
- [2] SAINT, Version 7.56a and SADABS Version 2008/1. Bruker AXS Inc., Madison, Wisconsin, USA (2008).
- [3] Altomare, A.; Casciarano, G.; Giacovazzo, C.; Guagliardi, Moliterni A. G. G.; A.; Burla, M. C.; Polidori, G.; Camalli, M.; Spagna, R. "SIR97", A New Tool for Crystal Structure Determination and Refinement; *J. Appl. Crystallogr.* **1999**, *32*, 115-119.

- [3a] Sheldrick, G. M. "SHELXS-97", Program for Crystal Structure Solution, Göttingen, (1997).  
[4] International Tables for Crystallography, Vol. C, Tables 6.1.1.4 (pp. 500-502), 4.2.6.8 (pp. 219-222), and 4.2.4.2 (pp. 193-199), Wilson, A. J. C., Ed., Kluwer Academic Publishers, Dordrecht, The Netherlands, 1992.  
[5] Sheldrick, G. M. "SHELXL-97", University of Göttingen, Göttingen, Germany, (1998).  
[6] Spek, A. L. "PLATON", A Multipurpose Crystallographic Tool, Utrecht University, Utrecht, The Netherlands, (2010).  
[7] L. J. Farrugia, "WinGX (Version 1.70.01 January 2005)", *J. Appl. Cryst.* **1999**, *32*, 837-838.

## Single Crystal X-Ray Structure Determinations of Compound 3-5

Operator: \*\*\* Bettina Bechlars \*\*\*

### General:

Crystallographic details for compounds **3-5** are summarised in Table S1. The data were collected on an X-ray diffractometer equipped with a CCD detector (APEX II,  $\kappa$ -CCD), a rotating anode (Bruker AXS, FR591) with MoK $_{\alpha}$  radiation ( $\lambda = 0.71073 \text{ \AA}$ ), and a graphite monochromator by using the SMART software package. [1] The measurements were performed on single crystals coated with Paratone oil and mounted on Kapton loops. Each crystal was frozen under a stream of nitrogen. A matrix scan using at least 20 centred reflections was used to determine the initial lattice parameters. Reflections were merged and corrected for Lorentz and polarisation effects, scan speed, and background using SAINT 4.15. [2] Absorption corrections, including odd and even ordered spherical harmonics were performed using SADABS. [2] Space group assignments were based upon systematic absences, *E* statistics, and successful refinement of the structures. Structures were solved by direct methods with the aid of successive difference Fourier maps, and were refined against all data using WinGX [7] based on SHELXS-97. [3a] Hydrogen atoms were assigned to ideal positions and refined using a riding model with an isotropic thermal parameter 1.2 times that of the attached carbon atom (1.5 times for methyl hydrogen atoms). If not mentioned otherwise, non-hydrogen atoms were refined with anisotropic displacement parameters. Full-matrix least-squares refinements were carried out by minimizing  $\sum w(F_o^2 - F_c^2)^2$  with SHELXL-97 [5] weighting scheme. Neutral atom scattering factors for all atoms and anomalous dispersion corrections for the non-hydrogen atoms were taken from *International Tables for Crystallography*. [4] Images of the crystal structures were generated by PLATON [6].

### Remarks on the refinement of compounds 3, 4 and 5:

**3:** Since the disorder of non-coordinated acetonitrile molecules could not be resolved, SQUEEZE was applied to remove 297 electrons corresponding to 13.5 acetonitrile molecules per unit cell. Furthermore, a disorder of the tetrafluorophenyl ring of one of the bridging ligands was resolved. The refinement, however did not lead to reasonable values. The non-hydrogen atoms C2a, C2b, C5a, C5b, C6b, and C36 were refined isotropically, since anisotropic refinement led to negative anisotropic displacement

parameters. These problems did not allow a full structure refinement. Hence, bond distances and angles are not discussed in any detail.

**4:** Full refinement was possible without running into problems.

**5:** Only for two of the four disordered tetrafluoroborate molecules a reasonable model was found to describe the disorder. This gives rise to additional electron density that could not be assigned.

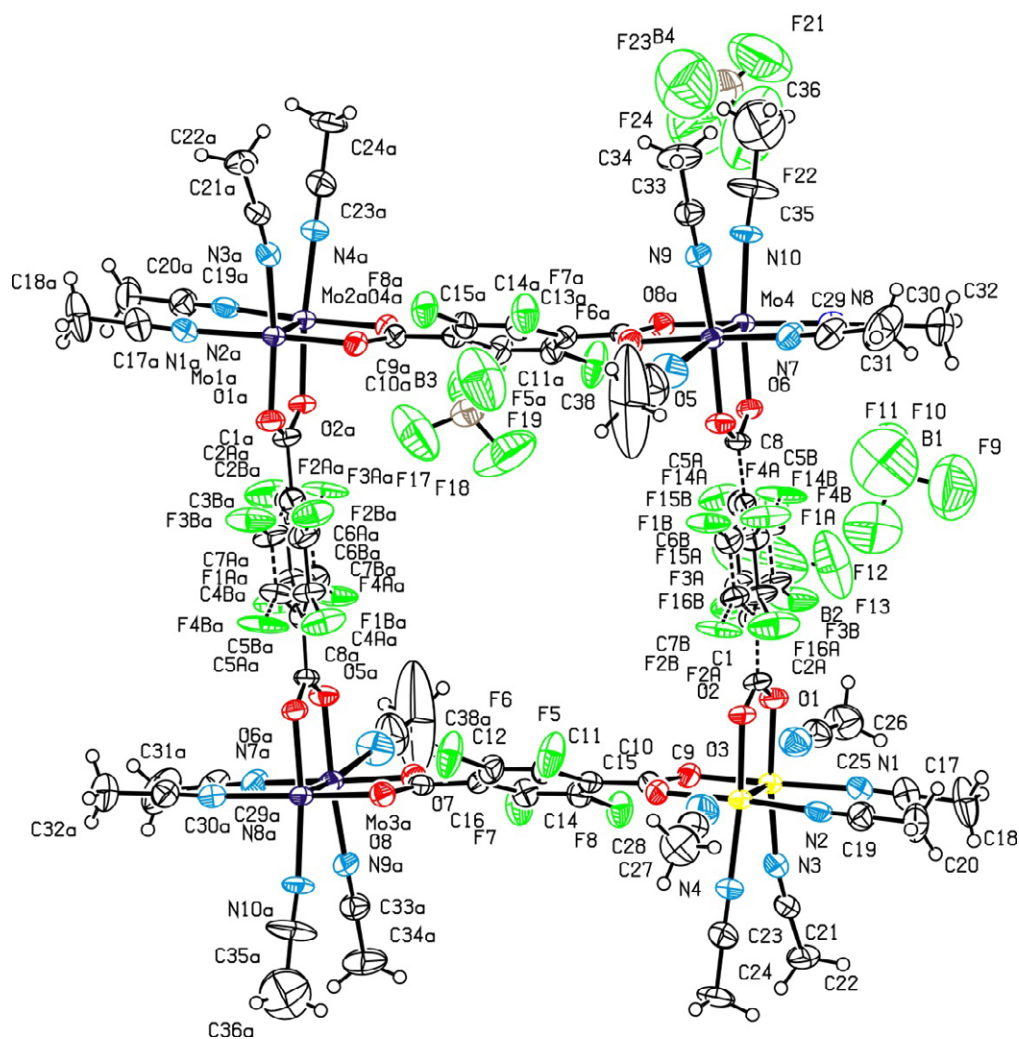

**Figure F2** – Ortepe drawing of compound **3** with 50% ellipsoids. [6]

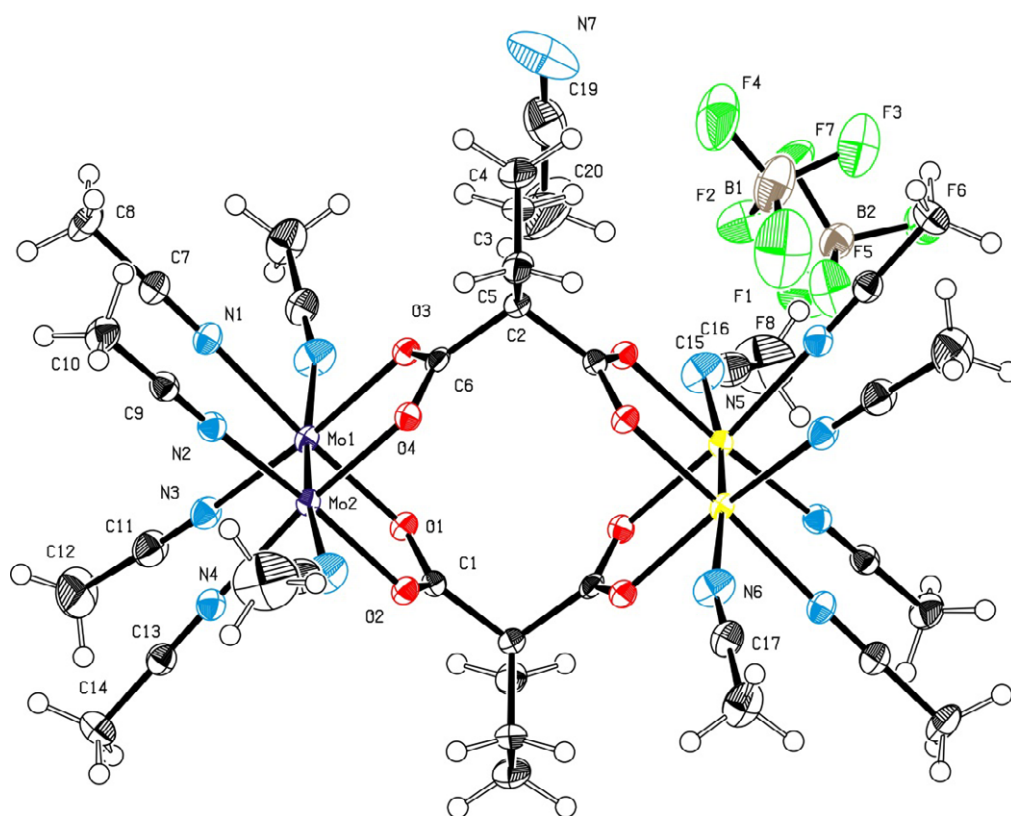

**Figure F3** – Ortep drawing of compound 4 with 50% ellipsoids. [6]

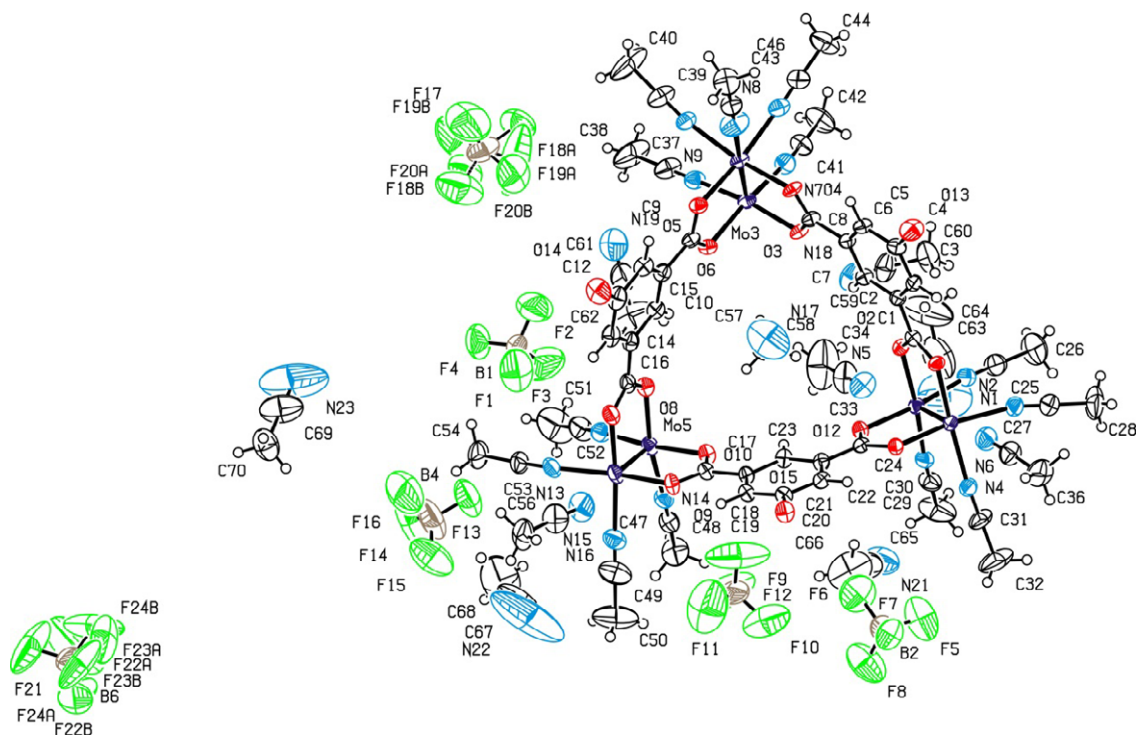

**Figure F4** – Ortep drawing of compound 5 with 50% ellipsoids. [6]



**Table S1.** Crystallographic details of compounds **3**, **4** and **5**.

| Compound Name                                                                                                 | <b>3</b>                                                                                                                 | <b>4</b>                                                                                                                                    | <b>5</b>                                                                                                                                     |
|---------------------------------------------------------------------------------------------------------------|--------------------------------------------------------------------------------------------------------------------------|---------------------------------------------------------------------------------------------------------------------------------------------|----------------------------------------------------------------------------------------------------------------------------------------------|
| Sum formula                                                                                                   | C <sub>76</sub> H <sub>66</sub> Mo <sub>8</sub> N <sub>22</sub> O <sub>16</sub> F <sub>16</sub> ,<br>8(BF <sub>4</sub> ) | C <sub>36</sub> H <sub>48</sub> Mo <sub>4</sub> N <sub>14</sub> O <sub>8</sub> ,<br>4(BF <sub>4</sub> ), 2(C <sub>2</sub> H <sub>3</sub> N) | C <sub>56</sub> H <sub>57</sub> Mo <sub>6</sub> N <sub>16</sub> O <sub>15</sub> ,<br>6(BF <sub>4</sub> ), 7(C <sub>2</sub> H <sub>3</sub> N) |
| M <sub>r</sub> (g/mol)                                                                                        | 1654.75                                                                                                                  | 1589.97                                                                                                                                     | 2578.05                                                                                                                                      |
| Crystal description                                                                                           | Red fragment                                                                                                             | Red fragment                                                                                                                                | Red fragment                                                                                                                                 |
| Crystal dimensions (mm <sup>3</sup> )                                                                         | 0.22 x 0.22 x 0.33                                                                                                       | 0.18 x 0.51 x 0.51                                                                                                                          | 0.10 x 0.13 x 0.25                                                                                                                           |
| T (K)                                                                                                         | 173(1)                                                                                                                   | 123(1)                                                                                                                                      | 173(1)                                                                                                                                       |
| crystal system,                                                                                               | Triclinic,                                                                                                               | Triclinic,                                                                                                                                  | Monoclinic,                                                                                                                                  |
| space group                                                                                                   | <i>P</i> $\bar{1}$ (I.T.-No.: 2)                                                                                         | <i>P</i> $\bar{1}$ (I.T.-No.: 2)                                                                                                            | <i>P</i> 2 <sub>1</sub> / <i>c</i> (I.T.-No.: 14)                                                                                            |
| <i>a</i> (Å)                                                                                                  | 14.2639(6)                                                                                                               | 10.6698(4)                                                                                                                                  | 14.7364(6)                                                                                                                                   |
| <i>b</i> (Å)                                                                                                  | 16.9759(8)                                                                                                               | 10.7944(5)                                                                                                                                  | 32.6112(13)                                                                                                                                  |
| <i>c</i> (Å)                                                                                                  | 17.5316(7)                                                                                                               | 15.1873(6)                                                                                                                                  | 22.5349(9)                                                                                                                                   |
| $\alpha$ (°)                                                                                                  | 96.067(2)                                                                                                                | 89.095(2)                                                                                                                                   | 90                                                                                                                                           |
| $\beta$ (°)                                                                                                   | 98.424(2)                                                                                                                | 86.007(2)                                                                                                                                   | 104.233(2)                                                                                                                                   |
| $\gamma$ (°)                                                                                                  | 99.904(2)                                                                                                                | 64.711(2)                                                                                                                                   | 90                                                                                                                                           |
| <i>V</i> (Å <sup>3</sup> )                                                                                    | 4099.3(3)                                                                                                                | 1577.53(1)                                                                                                                                  | 10497.2(7)                                                                                                                                   |
| <i>Z</i>                                                                                                      | 1                                                                                                                        | 1                                                                                                                                           | 4                                                                                                                                            |
| <i>D</i> <sub>calc</sub> (g/cm <sup>3</sup> )                                                                 | 1.341                                                                                                                    | 1.674                                                                                                                                       | 1.631                                                                                                                                        |
| <i>F</i> <sub>000</sub>                                                                                       | 1612                                                                                                                     | 788                                                                                                                                         | 5108                                                                                                                                         |
| $\mu$ (mm <sup>-1</sup> )                                                                                     | 0.693                                                                                                                    | 0.880                                                                                                                                       | 0.803                                                                                                                                        |
| Index ranges(± <i>h</i> , ± <i>k</i> , ± <i>l</i> )                                                           | 15/-15, 17/-17, 18/-18                                                                                                   | 13/-13, 13/-13, 18/-18                                                                                                                      | 17/-17, 39/-39, 27/-27                                                                                                                       |
| $\theta$ -ranges (°)                                                                                          | 1.18-22.02                                                                                                               | 1.34-26.00                                                                                                                                  | 1.12-25.43                                                                                                                                   |
| Collected reflections                                                                                         | 83623                                                                                                                    | 27873                                                                                                                                       | 171685                                                                                                                                       |
| Unique reflections [all data]                                                                                 | 9338                                                                                                                     | 6159                                                                                                                                        | 19264                                                                                                                                        |
| <i>R</i> <sub>int</sub> / <i>R</i> <sub><math>\sigma</math></sub>                                             | 0.0294/0.0155                                                                                                            | 0.0300/0.0223                                                                                                                               | 0.0416/0.0248                                                                                                                                |
| Unique reflections [ <i>I</i> <sub>0</sub> >2 $\sigma$ ( <i>I</i> <sub>0</sub> )]                             | 8299                                                                                                                     | 5979                                                                                                                                        | 16530                                                                                                                                        |
| Data/Restraints/Parameter                                                                                     | 9338/81/878                                                                                                              | 6159/0/395                                                                                                                                  | 19264/0/1377                                                                                                                                 |
| GoF (on <i>F</i> <sup>2</sup> )                                                                               | 1.111                                                                                                                    | 1.058                                                                                                                                       | 1.178                                                                                                                                        |
| <i>R</i> <sub>1</sub> / <i>wR</i> <sub>2</sub> [ <i>I</i> <sub>0</sub> >2 $\sigma$ ( <i>I</i> <sub>0</sub> )] | 0.0571/0.1721                                                                                                            | 0.0231/0.0622                                                                                                                               | 0.0658/0.1442                                                                                                                                |
| <i>R</i> <sub>1</sub> / <i>wR</i> <sub>2</sub> [all data]                                                     | 0.0611/0.1679                                                                                                            | 0.0238/0.0628                                                                                                                               | 0.0787/0.1523                                                                                                                                |
| Max./Min. residual electron density                                                                           | 1.46/-0.69                                                                                                               | 0.90/-0.68                                                                                                                                  | 1.74/-1.02                                                                                                                                   |
| Remarks                                                                                                       | Refinements aborted                                                                                                      |                                                                                                                                             | Refinements aborted                                                                                                                          |
